# Supplementary material
Source: publisher figshare collection journal article supplement (https://acs.figshare.com/ndownloader/files/5159707)

## Supporting Information

### Selective Amine Recognition: Development of a Chemosensor for Dopamine and Norepinephrine

Kristen E. Secor and Timothy E. Glass\*

Department of Chemistry, University of Missouri, Columbia, MO 65211

#### Spectroscopic Analysis:

Fluorescence spectra were recorded on a Shimadzu RF-5301 PC spectrofluorimeter at 37 °C. Excitation wavelengths were 446, 484 and 495 nm with excitation and emission slit widths of 5 nm each. Absorption spectra were recorded on a Cary 1E spectrophotometer at 37 °C. Solutions of compound **2** were prepared at 10  $\mu$ M in buffered water (100 mM Na<sub>2</sub>S<sub>2</sub>O<sub>3</sub>, 50 mM HEPES, 20 mM NaCl, pH = 7.0). Sodium thiosulfate was used to prevent oxidation of the catechol guests. All guest solutions were prepared as above and contained 10  $\mu$ M **2** to prevent dilution.

Titration curves were recorded by recording fluorescence intensity at 505 nm (for  $\lambda_{\text{ex}}$  = 446 and 484 nm) and 515 (for  $\lambda_{\text{ex}}$  = 495 nm) as a function of added analyte and fitting the data to a one-site binding isotherm using Graphpad Prism software. A 1:1 binding model was assumed and the data fit this model well for all analytes tested. The fluorescence intensity at saturation ( $I_{\text{sat}}$ ) was taken from the theoretical fit to the data.

#### Synthetic Procedures:

**General Methods.** All reactions were carried out in dried glassware under N<sub>2</sub> atmosphere. Tetrahydrofuran (THF) and diethyl ether were distilled from sodium benzophenone ketyl under N<sub>2</sub> before use. Methylene chloride (CH<sub>2</sub>Cl<sub>2</sub>) and triethylamine (Et<sub>3</sub>N) were distilled from CaH<sub>2</sub> under N<sub>2</sub> before use. Flash chromatography was performed with 32-63  $\mu$ m silica gel. All melting points are uncorrected. NMR spectra were recorded on Bruker ARX 250, DRX 300, or DRX 500 instruments as noted below in the solvents recorded. IR spectra were recorded on a Nexus 670 FT-IR E.S.P. spectrometer.

**Compound 5:** A solution of TBS-protected 5-iodopentanol (2.35 g, 7.15 mmol) and Et<sub>2</sub>O (70 mL) in a flame-dried, N<sub>2</sub>-flushed flask was cooled to -78 °C. tBuLi (10.0 mL, 1.5 M, 15.0 mmol) was added, and the mixture was stirred at -78 °C for 5 min., then at ambient temperature for 1 h. The solution was cooled to 0 °C, and CuI (681 mg, 3.58 mmol) was added. The mixture was stirred at 0 °C for 10 min.; the mixture turned dark purple. The reaction mixture was cooled to -78 °C, and THF (35 mL) was added. Coumarin chloroaldehyde **3** (1.00 g, 3.58 mmol) in THF (35 mL) was added via cannula. The reaction was stirred under N<sub>2</sub> at -78 °C for 30 min. then quenched with saturated NH<sub>4</sub>Cl (75 mL). The mixture was extracted with CH<sub>2</sub>Cl<sub>2</sub> (3 x 150 mL). The combined organic layers were dried over MgSO<sub>4</sub>, and the solvent was removed *in vacuo*. The resulting solid was purified via flash chromatography (EtOAc/hex, 10:90 to 15:85), and compound **5** was isolated as a yellow solid (1.01 g, 63%, mp = 103-105 °C). <sup>1</sup>H NMR (250 MHz, CDCl<sub>3</sub>)  $\delta$  10.36 (s, 1H), 7.61 (d,  $J$  = 9.3 Hz, 1H), dd (6.65,  $J$  = 2.6, 9.3 Hz, 1H), 6.46 (d,  $J$  = 2.6 Hz, 1H), 3.63 (t,  $J$  = 5.9 Hz, 2H), 3.46 (q,  $J$  = 7.1 Hz, 4H), 3.26 (t,  $J$  = 7.9 Hz, 2H), 1.57-1.62 (m, 6H), 1.25 (t,  $J$  = 7.1 Hz, 6H), 0.88 (s, 9H), 0.045 (s, 6H). <sup>13</sup>C NMR (62.5 MHz, CDCl<sub>3</sub>)  $\delta$  190.2, 163.5, 162.7, 157.2, 152.4, 128.3, 111.1, 109.7, 108.1, 96.9, 62.6, 44.8, 32.2, 30.0, 27.4, 26.0, 25.7, 18.0, 12.2, -5.6. FTIR (neat) 2933, 2860, 1716, 1679, 1615, 1560, 1509, 1450, 1356, 1258, 1148 cm<sup>-1</sup>. HRMS: Calcd for C<sub>25</sub>H<sub>39</sub>LiNO<sub>4</sub>Si (M+Li)<sup>+</sup>: 452.2808. Found: 452.2806.

Compound **6**: H<sub>2</sub>O (22 mL) and AcOH (66 mL) were added to a solution of compound **5**, (1.00 g, 2.24 mmol) in THF (22 mL). The mixture was stirred at ambient temperature for 2 h. The reaction mixture was quenched with solid K<sub>2</sub>CO<sub>3</sub> to pH = 8, extracted with CH<sub>2</sub>Cl<sub>2</sub> (3 x 150 mL), dried on MgSO<sub>4</sub>, and the solvent was removed *in vacuo*. The resulting solid was purified via flash chromatography (EtOAc/hex, 20:80 to 80:20), and the product alcohol was isolated as a yellow solid (622 mg, 84%, mp = 122-123°C). <sup>1</sup>H NMR (250 MHz, CDCl<sub>3</sub>) δ 10.3 (s, 1H), 7.62 (d, *J* = 9.4 Hz, 1H), 6.66 (dd, *J* = 2.5, 9.3 Hz, 1H), 6.44 (d, *J* = 2.5 Hz, 1H), 3.68 (t, *J* = 5.6 Hz, 2H), 3.47 (q, *J* = 7.1 Hz, 4H), 3.25 (t, *J* = 6.8 Hz, 2H), 2.10 (s, 1H), 1.62-1.69 (m, 6H), 1.25 (t, *J* = 7.1 Hz, 6H). <sup>13</sup>C NMR (62.5 MHz, CDCl<sub>3</sub>) δ 190.7, 163.8, 163.1, 157.4, 152.6, 128.5, 111.3, 109.9, 108.3, 97.1, 62.5, 45.0, 32.2, 30.1, 27.6, 26.2, 12.4. FTIR (neat) 2932, 1709, 1675, 1612, 1556, 1505, 1447, 1354, 1268, 1203, 1147 cm<sup>-1</sup>. HRMS: Calcd for C<sub>19</sub>H<sub>25</sub>LiNO<sub>4</sub> (M+Li)<sup>+</sup>: 338.1944. Found: 338.1946.

A solution of the above prepared alcohol (622 mg, 1.88 mmol), CH<sub>2</sub>Cl<sub>2</sub> (30 mL), and NEt<sub>3</sub> (800 μL, 5.69 mmol) was placed in a flame-dried, N<sub>2</sub>-filled flask and cooled to 0 °C. MsCl (300 μL, 3.88 mmol) was added. The reaction was stirred under N<sub>2</sub> at 0 °C for 20 min. The solvent was removed *in vacuo*. The resulting solid was purified via flash chromatography (EtOAc:hex, 40:60 to 50:50), and the product mesylate was isolated as a yellow solid (768 mg, 100%, mp = 96-97°C). <sup>1</sup>H NMR (250 MHz, CDCl<sub>3</sub>) δ 10.30 (s, 1H), 7.61 (d, *J* = 9.3 Hz, 1H), 6.69 (dd, *J* = 2.5, 9.3 Hz, 1H), 6.43 (d, *J* = 2.5 Hz, 1H), 4.29 (t, *J* = 6.4 Hz, 2H), 3.48 (q, *J* = 7.1 Hz, 4H), 3.23 (t, *J* = 7.2 Hz, 2H), 3.06 (s, 3H), 1.87 (p, *J* = 6.4 Hz, 2H), 1.63-1.66 (m, 4H), 1.26 (t, *J* = 7.1 Hz, 6H). <sup>13</sup>C NMR (62.5 MHz, CDCl<sub>3</sub>) δ 190.3, 163.0, 162.7, 157.2, 152.5, 128.2, 111.0, 109.9, 108.0, 96.9, 69.8, 44.8, 36.9, 29.3, 28.3, 27.1, 25.4, 12.2. FTIR (neat) 2935, 2361, 1708, 1674, 1613, 1557, 1506, 1449, 1351, 1267, 1203, 1171, 1115 cm<sup>-1</sup>. HRMS: Calcd for C<sub>20</sub>H<sub>27</sub>LiNO<sub>6</sub>S (M+Li)<sup>+</sup>: 416.1719. Found: 416.1700.

NaI (697 mg, 3.75 mmol) was added to a solution of the mesylate (768 mg, 1.88 mmol) in acetone (25 mL). The mixture was stirred at ambient temperature for 13 h. The solvent was removed *in vacuo*, and the resulting yellow solid was dissolved in CH<sub>2</sub>Cl<sub>2</sub> (100 mL) and H<sub>2</sub>O (100 mL). The layers were separated, and the aqueous phase was extracted with CH<sub>2</sub>Cl<sub>2</sub> (2 x 100 mL). The combined organic extracts were dried on MgSO<sub>4</sub>, and the solvent was removed *in vacuo*. The resulting yellow solid was purified via flash chromatography (EtOAc:hex, 20:80 to 25:75), and the product, compound **6**, was isolated as a yellow solid (648 mg, 83%, mp = 104-106°C). <sup>1</sup>H NMR (250 MHz, CDCl<sub>3</sub>) δ 10.35 (s, 1H), 7.60 (d, *J* = 9.3 Hz, 1H), 6.66 (dd, *J* = 2.4, 9.3 Hz, 1H), 6.46 (d, *J* = 2.3 Hz, 1H), 3.47 (q, *J* = 7.1 Hz, 4H), 3.20-3.26 (m, 4H), 1.92 (p, *J* = 6.7 Hz, 2H), 1.62-1.63 (m, 4H), 1.25 (t, *J* = 7.1 Hz, 6H). <sup>13</sup>C NMR (62.5 MHz, CDCl<sub>3</sub>) δ 190.8, 163.4, 163.4, 157.6, 152.6, 128.4, 111.6, 109.9, 108.4, 97.3, 45.1, 32.9, 30.8, 29.2, 27.5, 12.5, 6.8. FTIR (neat) 1711, 1674, 1213, 1557, 1506, 1446, 1383. HRMS: Calcd for C<sub>19</sub>H<sub>24</sub>ILiNO<sub>3</sub> (M+Li)<sup>+</sup>: 448.0961. Found: 448.0961.

Compound **2**. Compound **6** (85 mg, 0.194 mmol), amine **7** (47 mg, 0.285 mmol), and K<sub>2</sub>CO<sub>3</sub> (134 mg, 0.968 mmol) were placed in a sealed vessel with THF (2 mL). The mixture was stirred at 48 °C for 14 h. The mixture was cooled, poured onto H<sub>2</sub>O (10 mL), extracted with CH<sub>2</sub>Cl<sub>2</sub> (3 x 10 mL), dried on MgSO<sub>4</sub>, and the solvent was removed *in vacuo*. The resulting solid was purified by HPLC (Xorbax XDB-C18 column, 0.1% TFA/H<sub>2</sub>O:0.1% TFA/MeCN, 90:10 to 0:100) to give compound **2** as a yellow solid (37.4 mg, 40%, mp = 92-94°C). <sup>1</sup>H NMR (250 MHz, MeOD) δ 10.21 (s, 1H), d (7.76, *J* = 9.4 Hz, 1H), 7.57 (d, *J* = 6.8 Hz, 1H), 7.10-7.26 (m, 3H), 6.28 (dd, *J* = 2.6, 9.4 Hz, 1H), 6.52 (d, *J* = 2.6 Hz, 1H), 4.09 (s, 2H), 3.53 (q, *J* = 7.1 Hz, 4H), 2.98 (t, *J* = 8.2 Hz, 2H), 2.57 (s, 3H), 1.78-1.85 (m, 2H), 1.59 (m, 4H), 1.23 (t, *J* = 7.1 Hz, 6H). <sup>13</sup>C NMR (125 MHz, MeOD) δ 191.7, 165.6, 165.1, 159.1, 154.8, 134.8, 133.6, 132.4, 130.2, 129.9, 128.5, 127.6, 112.0, 111.8, 109.5, 98.0, 64.1, 56.4, 46.0, 40.2, 31.1, 28.3, 28.2, 24.6, 12.8. FTIR (neat) 2361, 2336, 1704, 1673, 1610, 1555, 1503, 1444, 1351, 1263, 1201,

1140. For ESI MS, the sensor was dissolved in MeOH, generating the boronic acid dimethyl ester - HRMS: Calcd for  $C_{29}H_{39}BN_2O_5Na$  ( $M+Na^+$ ): 529.2844. Found: 529.2834.

# TBSO-pentyl coumarin

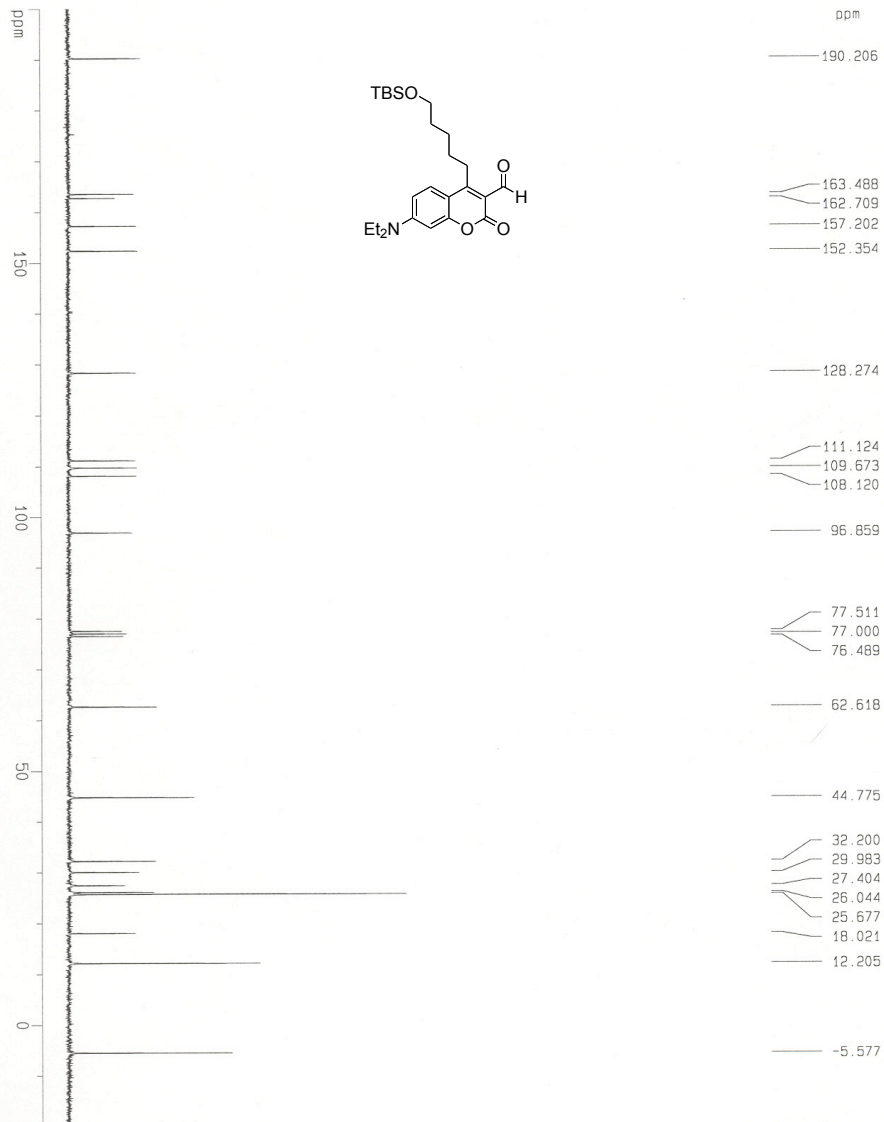

Current Data Parameters  
NAME Secord-1-04  
EXPNO 20  
PROCNO 1

F2 - Acquisition Parameters

Date\_ 20040401  
Time 16.31  
INSTRUM spect  
PROBHD 5 mm QNP 1H  
PULPROG zgpg30  
TD 36864  
SOLVENT CDCl3  
NS 134  
DS 4

SWH 17241.379 Hz  
FIDRES 0.467702 Hz  
AQ 1.0691060 sec  
RG 22800

DM 29.000 use  
DE 41.43 use  
TE 300.0 K

D12 0.00002000 sec  
DL5 23.00 dB  
CPOPRG Waltz16

P31 103.00 use  
D1 1.00000000 sec  
P1 5.35 use

SFO1 62.9023694 MHz  
NUCLEUS 13C  
D11 0.03000000 sec

F2 - Processing parameters

SI 32768  
SF 62.8952540 MHz  
WDW EM  
SSB 0  
LB 1.00 Hz  
GB 0  
PC 1.40

1D NMR plot parameters

CX 20.00 cm  
CY 6.00 cm  
F1P 200.000 ppm  
F1 12579.05 Hz  
F2P -20.000 ppm  
F2 -1257.91 Hz  
PPMCM 11.000000 ppm  
HZCM 691.84778 Hz/

coumarin-pentyl-alcohol

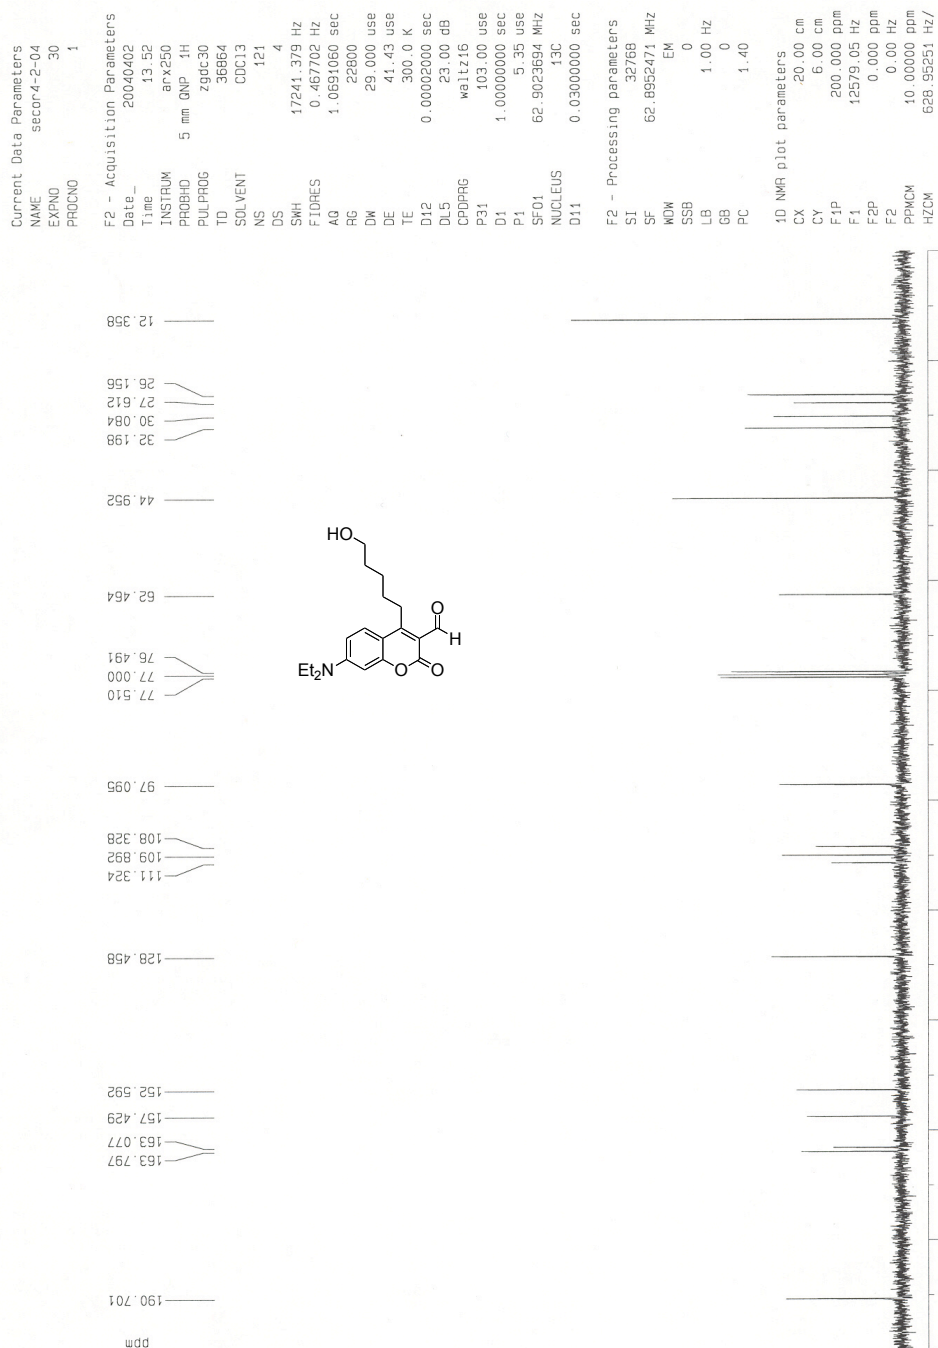

5C mesylate

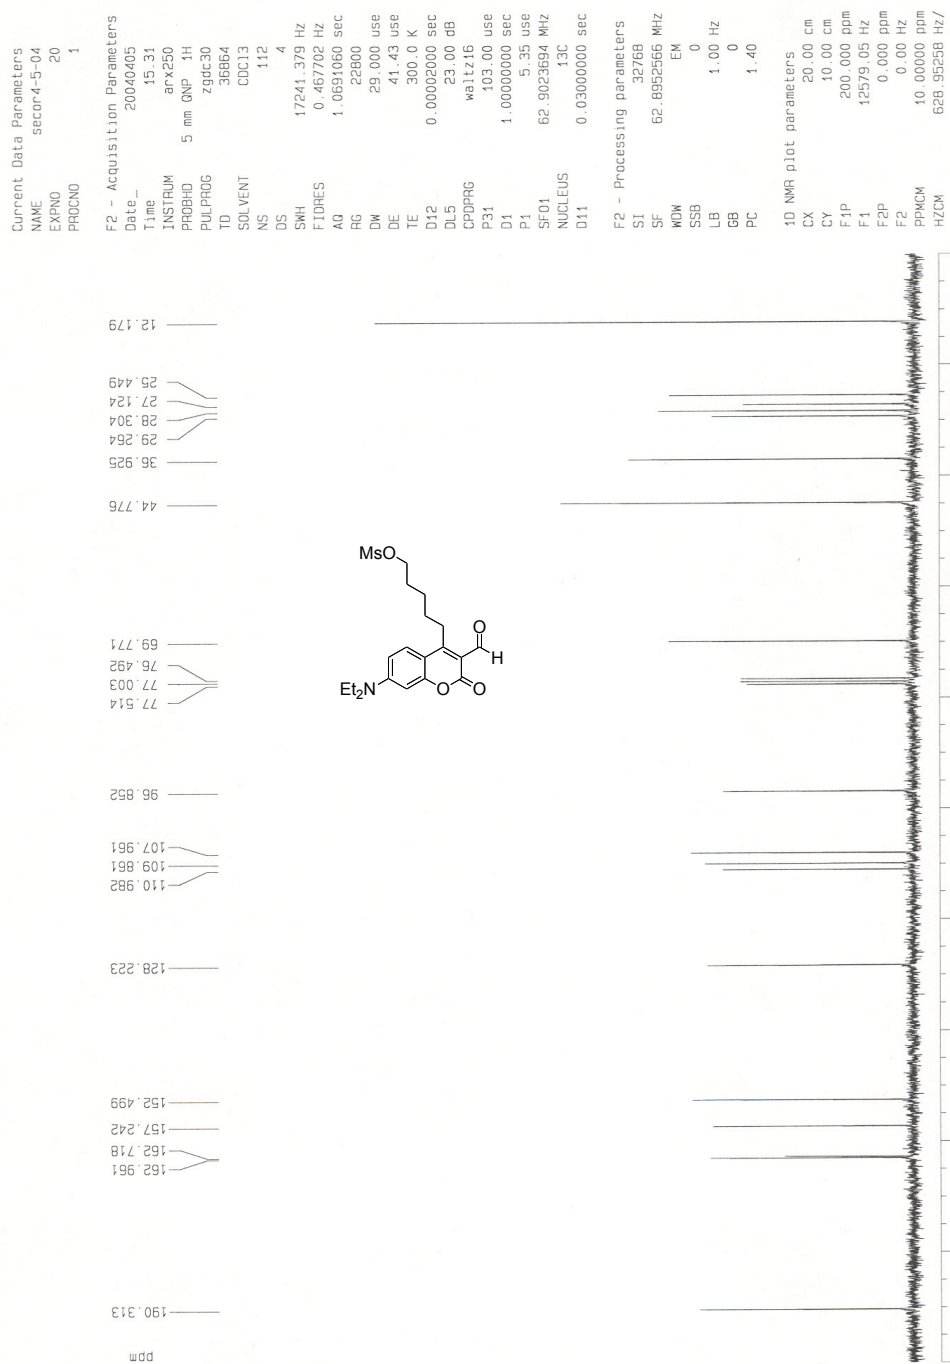



Current Data Parameters  
NAME sec03-30-04  
EXPNO 10  
PROCNO 1

F2 - Acquisition Parameters  
Date\_ 20040330  
Time 16:31  
INSTRUM arx250  
PROBHD 5 mm QNP 1H  
PULPROG zg30  
TD 32768  
SOLVENT CDCl3  
NS 16  
DS 2  
SWH 5208.333 Hz  
FIDRES 0.158946 Hz  
AQ 3.1457779 sec  
RG 1024  
DM 96.000 use  
DE 137.14 use  
TE 300.0 K  
D1 1.0000000 sec  
P1 8.70 use  
SF01 250.1315321 MHz  
NUCLEUS 1H

F2 - Processing parameters  
SI 16384  
SF 250.1300046 MHz  
WDW EM  
SSB 0  
LB 0.20 Hz  
GB 0  
PC 1.50

1D NMR plot parameters  
CX 20.00 cm  
CY 12.50 cm  
F1P 12.000 ppm  
F1 3001.56 Hz  
F2P -1.000 ppm  
F2 -250.13 Hz  
PPMCM 0.65000 ppm  
HZCM 162.58450 Hz/

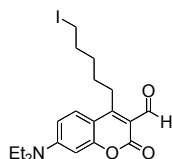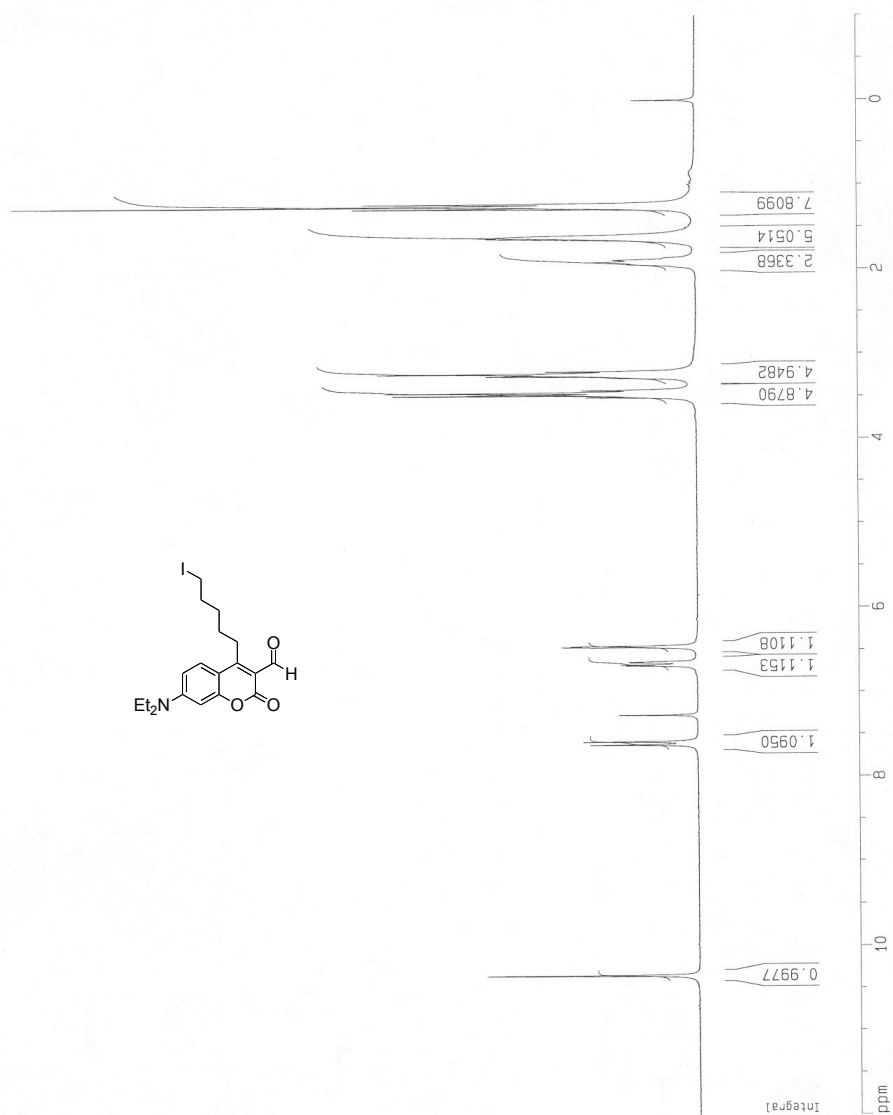

5C sensor

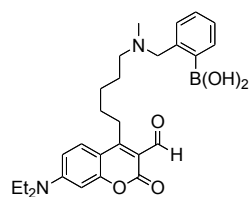

Current Data Parameters  
 NAME secor4-1-04  
 EXPNO 50  
 PROCNO 1

F2 - Acquisition Parameters  
 Date\_ 20040401  
 Time 17.30  
 INSTRUM arx250  
 PROBHD 5 mm QNP 1H  
 PULPROG zg30  
 TD 32768  
 SOLVENT CDCl3  
 NS 16  
 DS 2  
 SWH 5208.333 Hz  
 FIDRES 0.158946 Hz  
 AQ 3.1457779 sec  
 RG 2860  
 DW 96.000 use  
 DE 137.14 use  
 TE 300.0 K  
 D1 1.00000000 sec  
 P1 8.70 use  
 SF01 250.1315321 MHz  
 NUCLEUS 1H

F2 - Processing parameters  
 SI 16384  
 SF 250.1300089 MHz  
 WDW EM  
 SSB 0  
 LB 0.20 Hz  
 GB 0  
 PC 1.50

1D NMR plot parameters  
 CX 20.00 cm  
 CY 12.50 cm  
 F1P 12.000 ppm  
 F1 3001.56 Hz  
 F2P -1.000 ppm  
 F2 -250.13 Hz  
 PPMCM 0.65000 ppm  
 HZCM 162.58450 Hz/

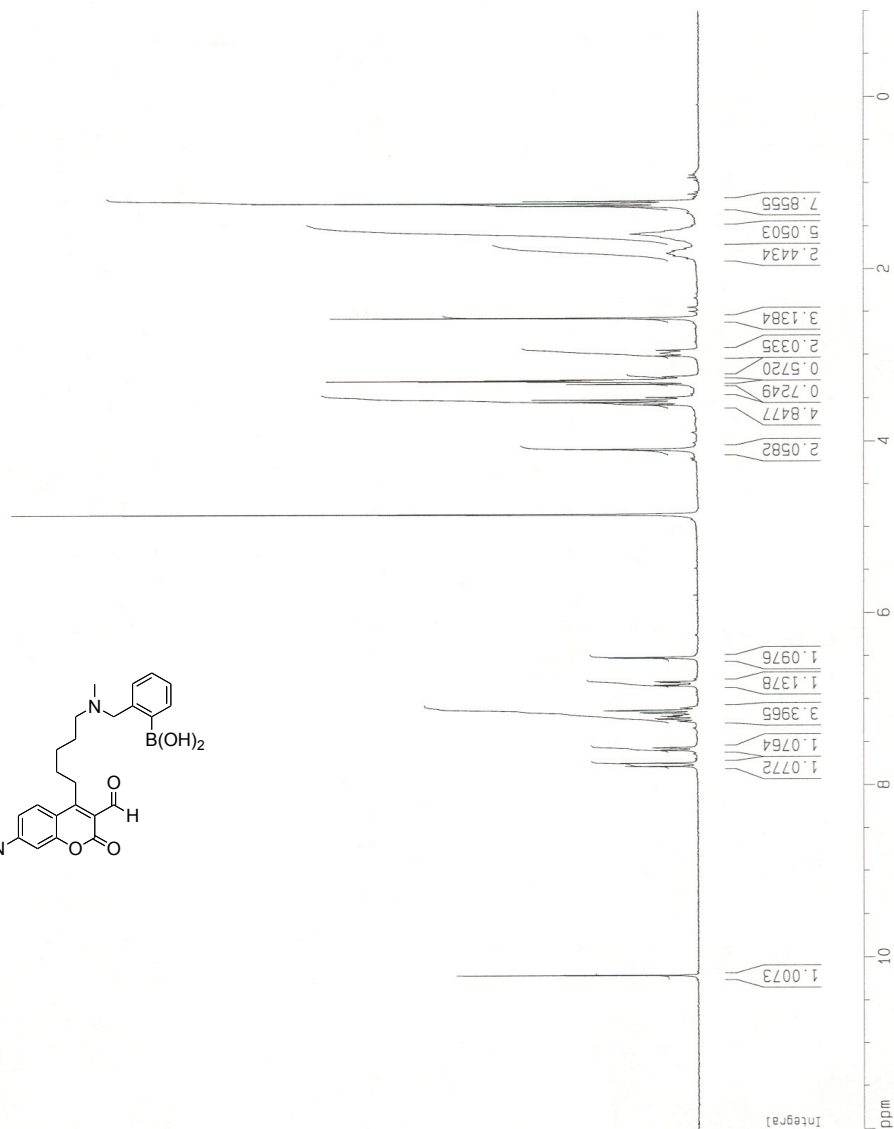

Supplement: Supplementary file 1 [file 5159707]
